# Supplementary material for: Seminar-case learning model improves clinical teaching: a prospective randomized controlled trial
Source: PeerJ. 2021 May 20;9:e11487. doi: 10.7717/peerj.11487 (PMC8141283; doi:10.7717/peerj.11487)
Supplement: Supplemental Information 1 [file peerj-09-11487-s001.xlsx]

## Sheet: Sheet1
group	gender	age	entrance score	Theoretical test scores	Case analysis test scores
control group 1	female	25	80	90	77
control group 2	male	25	85	84	92
control group 3	female	24	88	86	82
control group 4	female	26	69	82	81
control group 5	female	24	70	89	78
control group 6	male	23	71	81	79
control group 7	female	21	81	72	87
control group 8	female	27	87	82	82
control group 9	male	27	91	90	85
control group 10	male	23	71	78	79
control group 11	female	26	71	81	85
control group 12	female	25	81	88	83
control group 13	female	24	80	78	73
control group 14	male	22	69	82	77
control group 15	female	26	74	86	93
control group 16	female	21	81	86	87
control group 17	male	24	79	82	79
control group 18	male	25	77	80	79
control group 19	female	24	82	91	80
control group 20	female	23	78	88	84
control group 21	female	23	79	87	72
control group 22	female	25	79	92	81
control group 23	female	22	73	84	71
control group 24	male	27	92	95	95
control group 25	male	25	76	79	73
control group 26	male	28	73	79	75
control group 27	female	25	79	76	75
control group 28	female	28	86	88	70
control group 29	female	26	93	93	92
control group 30	male	25	83	78	89
control group 31	female	24	88	73	91
control group 32	female	26	71	71	80
control group 33	male	26	69	72	73
control group 34	female	28	72	85	75
control group 35	female	23	88	77	72
control group 36	male	27	87	78	89
control group 37	female	22	82	72	71
control group 38	male	23	70	76	82
control group 39	female	22	79	87	73
control group 40	male	22	78	90	91
control group 41	female	23	86	75	89
control group 42	female	23	88	80	72
group	gender	age	entrance score	Theoretical test scores	Case analysis test scores
experiment group 1	female	24	85	85	87
experiment group 2	female	26	75	84	89
experiment group 3	male	25	81	83	76
experiment group 4	female	23	75	78	80
experiment group 5	female	24	69	82	90
experiment group 6	male	24	74	85	84
experiment group 7	female	24	92	82	93
experiment group 8	female	26	86	75	92
experiment group 9	male	23	83	94	84
experiment group 10	male	27	82	90	90
experiment group 11	male	24	84	77	91
experiment group 12	female	25	75	88	80
experiment group 13	male	23	88	94	79
experiment group 14	female	22	77	83	87
experiment group 15	female	24	73	76	90
experiment group 16	male	21	72	81	93
experiment group 17	female	26	83	92	92
experiment group 18	male	27	78	81	87
experiment group 19	female	25	81	93	92
experiment group 20	male	27	81	77	94
experiment group 21	female	26	70	74	80
experiment group 22	male	23	89	87	93
experiment group 23	female	27	78	93	88
experiment group 24	male	26	72	86	86
experiment group 25	female	21	91	74	82
experiment group 26	female	25	78	88	79
experiment group 27	female	25	88	73	80
experiment group 28	male	28	72	80	84
experiment group 29	male	22	92	87	91
experiment group 30	female	24	89	84	84
experiment group 31	female	22	93	93	86
experiment group 32	male	27	88	84	88
experiment group 33	male	23	91	87	81
experiment group 34	male	24	89	92	84
experiment group 35	female	24	71	91	78
experiment group 36	female	24	90	80	82
experiment group 37	male	22	71	88	80
experiment group 38	female	27	76	77	82
experiment group 39	male	22	77	77	84
experiment group 40	female	25	76	78	76
experiment group 41	female	23	69	74	84
experiment group 42	male	25	86	91	85
experiment group 43	female	26	81	90	86
experiment group 44	male	22	75	88	81
experiment group 45	male	21	70	95	89
experiment group 46	male	28	84	89	90
experiment group 47	female	23	73	79	88
experiment group 48	female	22	80	80	87
experiment group 49	female	26	85	94	82
experiment group 50	female	26	92	82	86
